# Supplementary material
Source: PubMed Central journal article supplement (PMC3720827)
Supplement: NIHMS478326-supplement-1.pdf [file NIHMS478326-supplement-1.pdf]

**CD36 coordinates NLRP3 inflammasome activation by facilitating the intracellular nucleation  
from soluble to particulate ligands in sterile inflammation**

Frederick J. Sheedy<sup>1</sup>, Alena Grebe<sup>2</sup>, Katey J. Rayner<sup>1</sup>, Parisa Kalantari<sup>3</sup>, Bhamu Ramkhelawon<sup>1</sup>,  
Susan B. Carpenter<sup>3</sup>, Christine E. Becker<sup>4</sup>, Hasini N. Ediriweera<sup>1</sup>, Adam E. Mullick<sup>5</sup>, Douglas T.  
Golenbock<sup>3</sup>, Lynda M. Stuart<sup>4</sup>, Eicke Latz<sup>2,3,6</sup>, Katherine A. Fitzgerald<sup>3</sup> and Kathryn J. Moore<sup>1,7</sup>

<sup>1</sup>Department of Medicine, Marc and Ruti Bell Program for Vascular Biology and Disease, The Leon H.  
Charney Division of Cardiology, New York University School of Medicine, New York, NY, USA,

<sup>2</sup>Institute of Innate Immunity, University of Bonn, Bonn, Germany, <sup>3</sup>Department of Infectious Diseases  
and Immunology, University of Massachusetts Medical School, Worcester, MA, USA, <sup>4</sup>Laboratory of  
Developmental Immunology, Department of Pediatrics, Massachusetts General Hospital, Harvard  
Medical School, Boston, MA, USA, <sup>5</sup>Isis Pharmaceuticals, Carlsbad, CA, USA, <sup>6</sup>German Center for  
Neurodegenerative Diseases (DZNE), Bonn, Germany.

<sup>7</sup>Corresponding Author: Dr. Kathryn J Moore, Telephone: +1-212-2639498, E-mail:

Kathryn.Moore@nyumc.edu

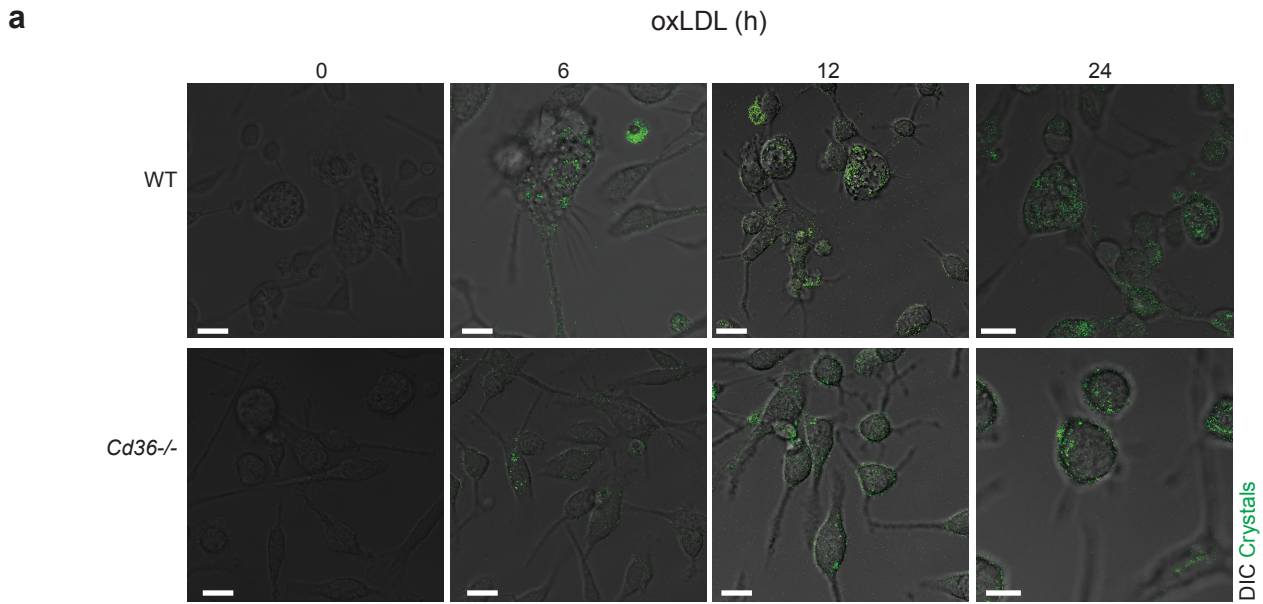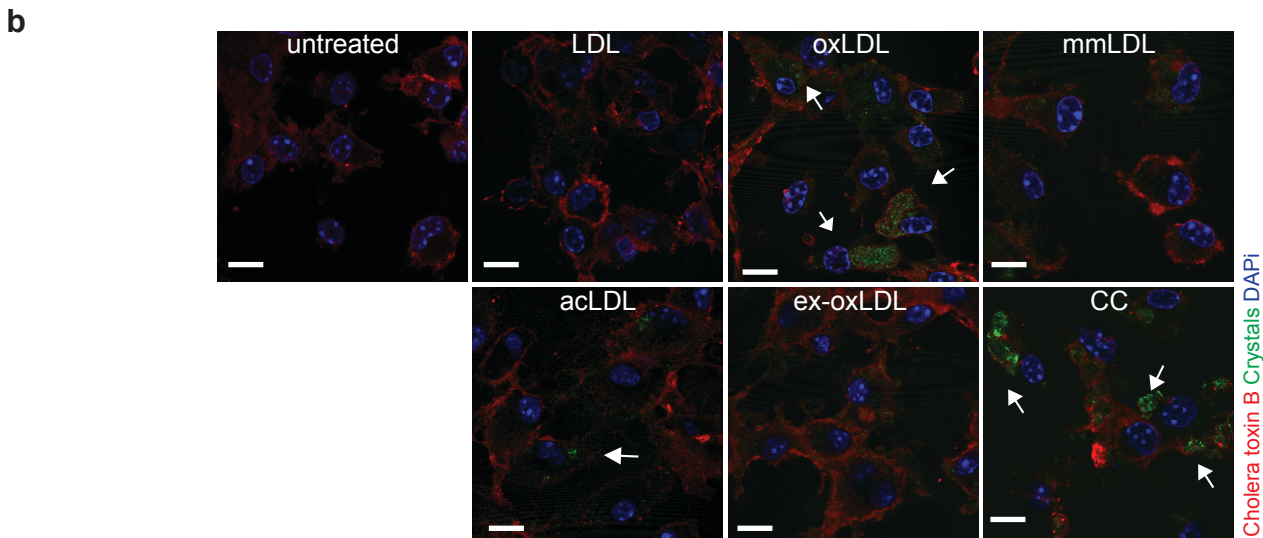

**Supplementary Figure 1.** Crystal formation induced by modified LDL. **a)** Time course analysis of the appearance of crystals in oxLDL-loaded macrophages of the indicated genotype. **b)** Confocal reflection analysis of crystals in macrophages loaded with the indicated species of modified LDL (all at 50  $\mu\text{g}/\text{mL}$ , 24h) following staining with DAPI (to stain nuclei) and Cholera toxin B (to stain plasma membranes). Images are representative of 2-3 independent experiments. Scale bar = 10  $\mu\text{m}$ .

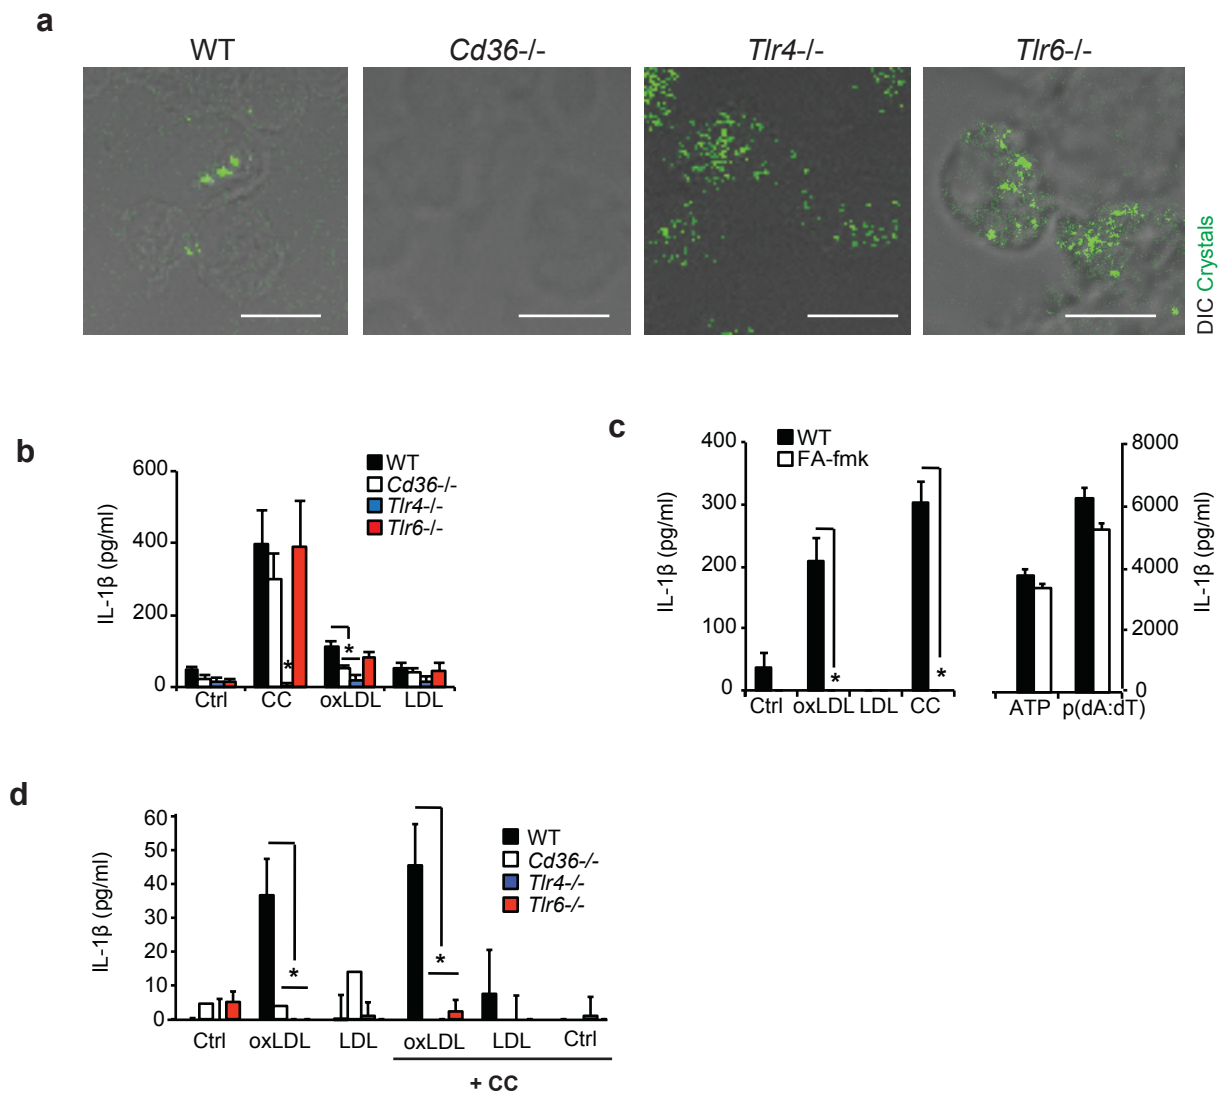

**Supplementary Figure 2.** Role of TLR4/TLR6 heterodimer in cholesterol crystal mediated inflammasome activation and priming by oxLDL **a)** Confocal reflection microscopy of macrophages from the indicated genotype following incubation with oxLDL (50  $\mu\text{g}/\text{mL}$ , 24 h). **b)** IL-1 $\beta$  ELISA of supernatants from LPS-primed BMDM of the indicated genotype incubated with the indicated inflammasome activators as follows; cholesterol crystals (CC – 1 mg/mL, 24 h), oxLDL (50  $\mu\text{g}/\text{mL}$ , 24 h) and unmodified LDL (LDL - 50  $\mu\text{g}/\text{mL}$ , 24 h). TLR4 null macrophages are resistant to priming with LPS and therefore produce no IL-1 $\beta$  and serve as a background control in the assay. **c)** IL-1 $\beta$  ELISA of supernatants from LPS-primed BMDM pre-treated with FA-fmk peptide (20  $\mu\text{M}$ , 1 h) prior to incubation with the indicated inflammasome activator as before or alongside ATP (5 mM, 1 h) or transfection with poly(dA:dT). **d)** IL-1 $\beta$  ELISA of supernatants from peritoneal macrophages of the indicated genotype primed as follows; oxLDL (50  $\mu\text{g}/\text{mL}$ , 6 h), unmodified LDL (LDL - 50  $\mu\text{g}/\text{mL}$ , 6 h) or PBS (Ctrl), followed by incubation with cholesterol crystals (+CC, 1 mg/mL, 12 h) to activate NLRP3. Data in b-d are mean  $\pm$  s.d. of triplicate samples within a single experiment and all panels are representative of three independent experiments. Scale bar = 10  $\mu\text{m}$ . \* $P < 0.05$ .

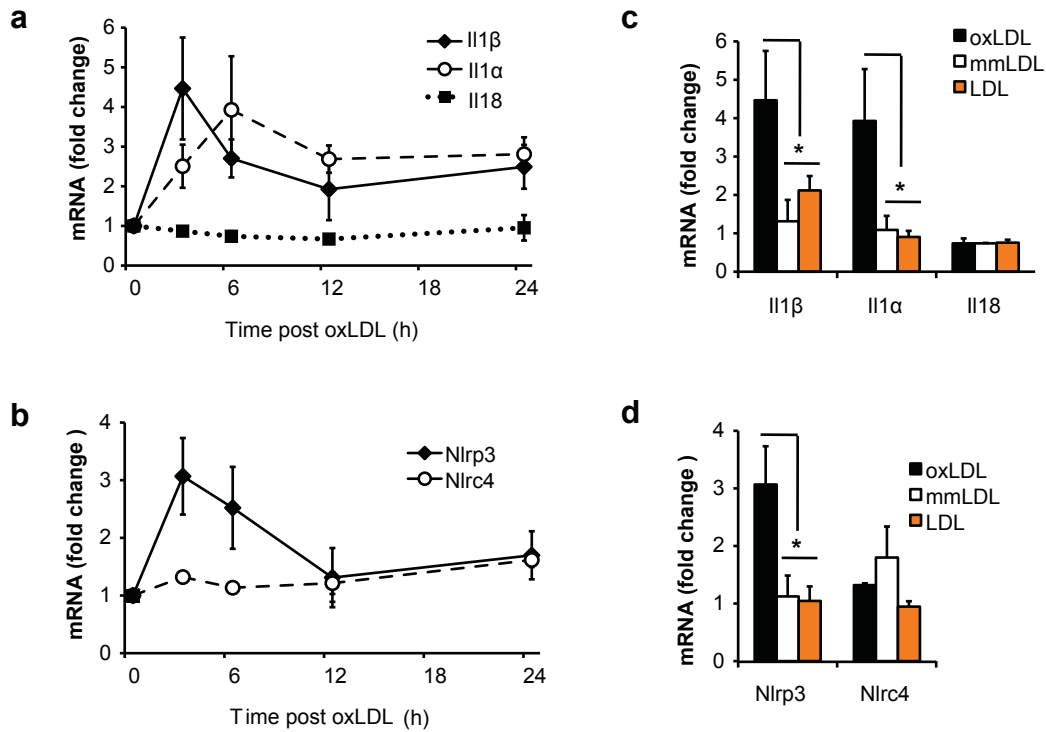

**Supplementary Figure 3.** Induction of inflammasome components by oxLDL **a & b**) Relative mRNA expression of the indicated gene in peritoneal macrophages treated with oxLDL (50  $\mu\text{g}/\text{mL}$ ) for the indicated times, measured by qRT-PCR. **b & d**) mRNA expression of the indicated gene in peritoneal macrophages following treatment with the indicated LDL species (oxLDL, minimally modified LDL or unmodified LDL at 50  $\mu\text{g}/\text{mL}$  for 3 h (Il1 $\beta$ , Nlrp3, Il18, Nlrc4) or 6 h (Il1 $\alpha$ ) measured by qRT-PCR. Data are mean  $\pm$  s.e.m. of three independent experiments. \* $P < 0.05$ .

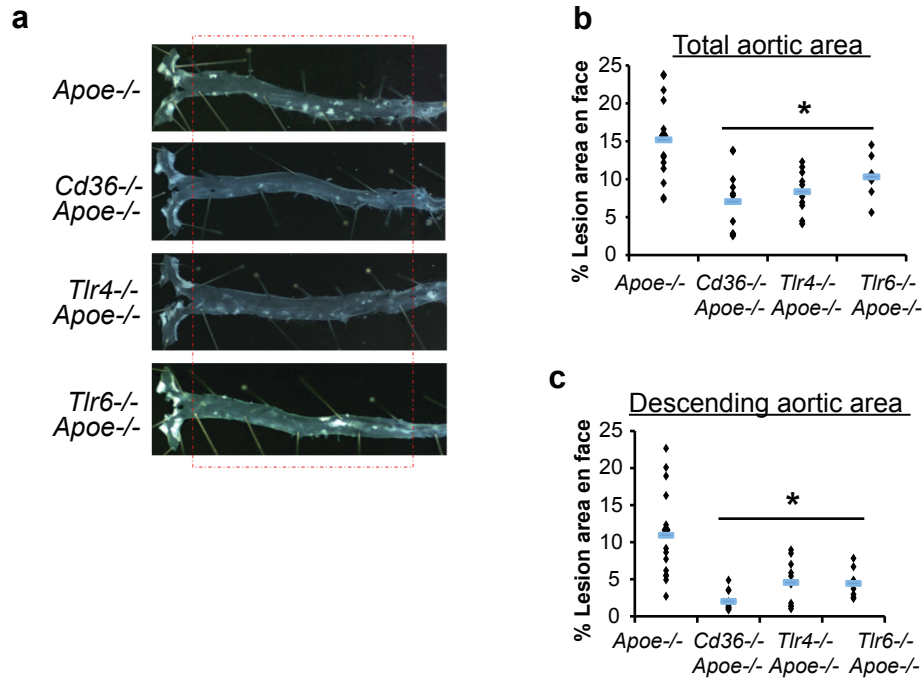

**Supplementary Figure 4.** Aortic atherosclerosis is reduced in atherogenic mice deficient in CD36, TLR4 or TLR6. Mice of the indicated genotype (*Apoe*<sup>-/-</sup>, *Cd36*<sup>-/-</sup>*Apoe*<sup>-/-</sup>, *Tlr4*<sup>-/-</sup>*Apoe*<sup>-/-</sup>, *Tlr6*<sup>-/-</sup>*Apoe*<sup>-/-</sup>) were fed a western diet for 12 weeks and aortic atherosclerosis was assessed. **(a)** Representative images of aortae from each genotype **(b-c)** Region specific lesion area in the aorta en face measured as a % of total aortic area (b) or as a % of the abdomino-thoracic (descending) aortic area (c). Data is presented for n=15 mice (*Apoe*<sup>-/-</sup>), n=10 mice/group (*Cd36*<sup>-/-</sup>*Apoe*<sup>-/-</sup> and *Tlr4*<sup>-/-</sup>*Apoe*<sup>-/-</sup>) and n=7 mice (*Tlr6*<sup>-/-</sup>*Apoe*<sup>-/-</sup>). Horizontal bars indicate the mean and symbols indicate individual mice (b-c). \*P<0.05.

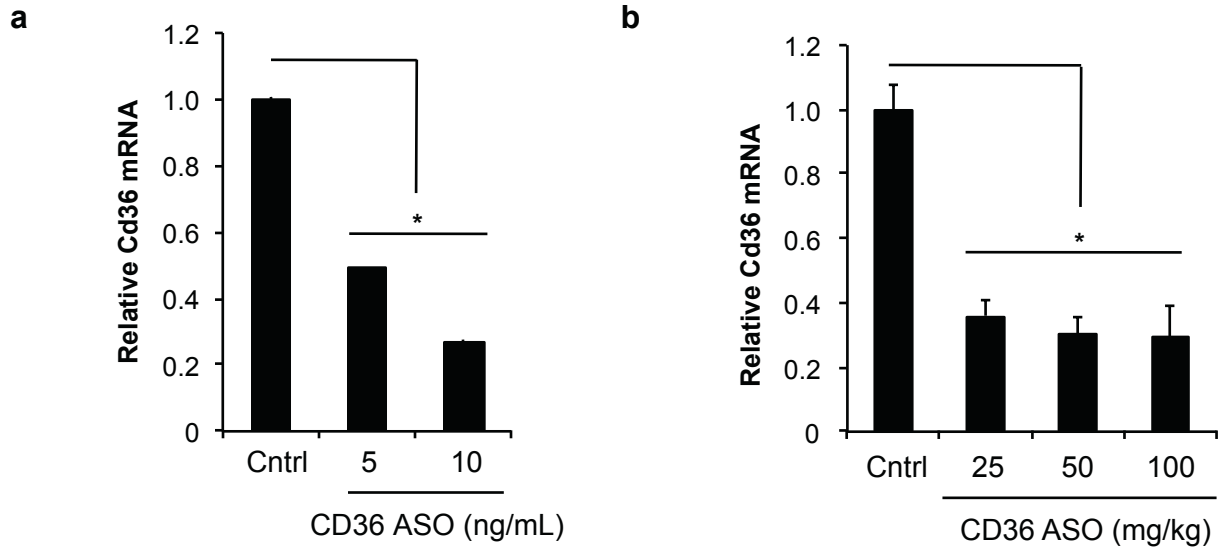

**Supplementary Figure 5.** Knockdown of CD36 mRNA by CD36-specific ASO. **a)** Relative CD36 mRNA expression in immortalized macrophages (iM $\phi$ ) transiently transfected with the indicated concentration of CD36-specific antisense oligonucleotide (ASO) or a control non-targeting oligonucleotide (Ctrl at 10 ng/mL) using Lipofectamine RNAiMax, as measured by qRT-PCR. **b)** Relative CD36 mRNA expression in resident peritoneal macrophages derived from mice treated with CD36-specific ASO at the indicated concentrations (sub-cutaneous injection, 1x weekly for 3 weeks) or control non-targeting oligonucleotide, as measured by qRT-PCR. Data are mean  $\pm$  s.d. of triplicate samples within a single experiment and are representative of 2-3 experiments. \*P<0.05.

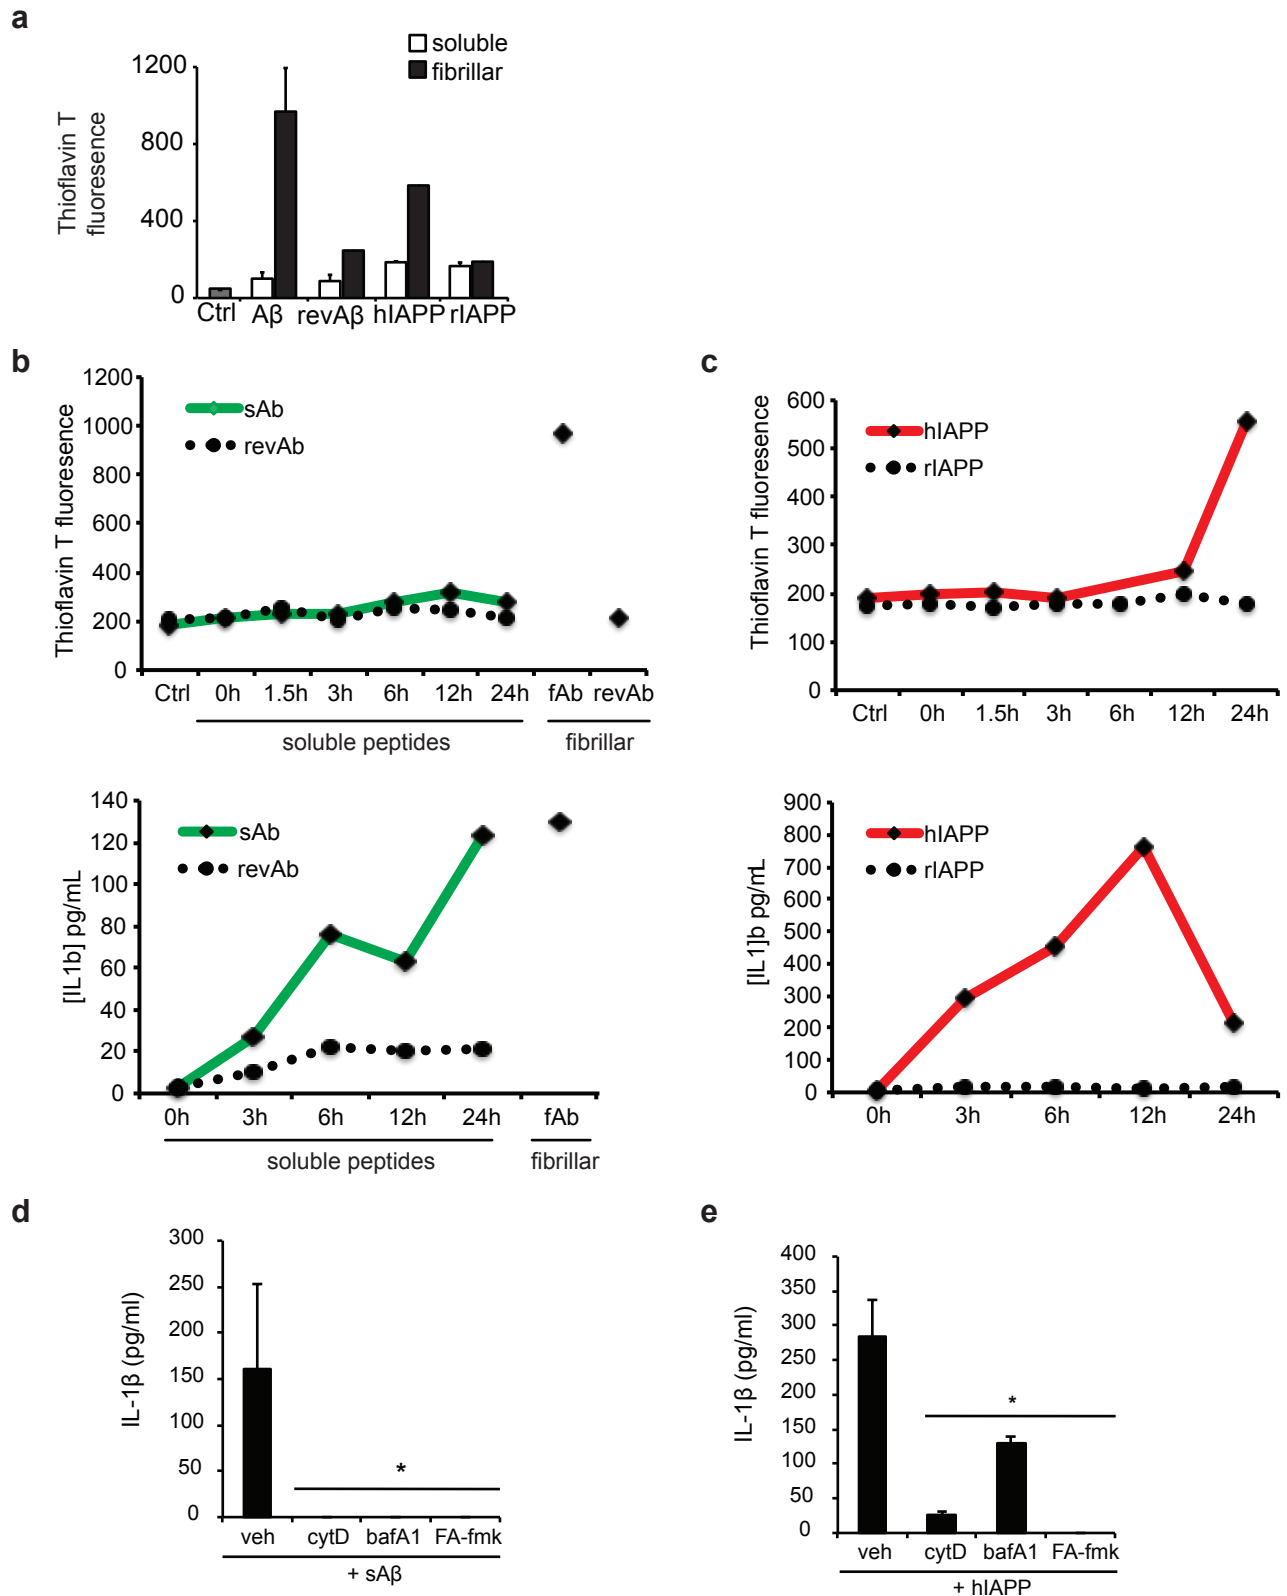

**Supplementary Figure 6.** Soluble amyloidogenic peptides activate the inflammasome via a phagolysosomal pathway. **(a)** Thioflavin T fluorescence of the indicated peptide preparations (soluble or made fibrillar *in-vitro*) to determine fibrillar content. Abbreviations -  $\beta$ -amyloid peptide (A $\beta$ ), reverse  $\beta$ -amyloid control (revA $\beta$ ), human IAPP (hIAPP), rat IAPP (rIAPP). **(b-c)** Monitoring of thioflavin T fluorescence of the indicated soluble peptides at 37 °C in DMEM media (top) measured in parallel with IL-1 $\beta$  secretion from LPS primed BMDM treated with (b) sA $\beta$  or revA $\beta$  (10  $\mu$ M), or (c) hIAPP or rIAPP (10  $\mu$ M) over the same time course (bottom). **(d-e)** IL-1 $\beta$  ELISA of supernatants from LPS-primed BMDM pre-treated with cytochalasin D (cytD, 1  $\mu$ M), bafilomycin A1 (bafA1, 500 nM) or FA-fmk peptide (20  $\mu$ M) prior to incubation with sA $\beta$  (10  $\mu$ M, 24 h) (d) or hIAPP (10  $\mu$ M, 6 h) (e). Data are mean  $\pm$  s.d. and representative of 3 independent experiments. \*P<0.05.

**Supplementary Table 1: Serum levels of total cholesterol in mice after 12 weeks western diet.**

**Total Cholesterol [mg/dL]**

**(mean  $\pm$  s.e.m.)**

| <b>Apoe<sup>-/-</sup></b><br><b>(n = 21)</b> | <b>Cd36<sup>-/-</sup>Apoe<sup>-/-</sup></b><br><b>(n = 14)</b> | <b>Tlr4<sup>-/-</sup>Apoe<sup>-/-</sup></b><br><b>(n = 15)</b> | <b>Tlr6<sup>-/-</sup>Apoe<sup>-/-</sup></b><br><b>(n = 7)</b> | <b>C57BL6</b><br><b>(n = 14)</b> |
|----------------------------------------------|----------------------------------------------------------------|----------------------------------------------------------------|---------------------------------------------------------------|----------------------------------|
| 786.08 $\pm$ 259.24                          | 859.31 $\pm$ 235.86                                            | 867.79 $\pm$ 331.21                                            | 1099.14 $\pm$ 121.95                                          | 97.72 $\pm$ 15.88                |



Supplemental References (from Methods section):

53. Boltz-Nitulescu G, Wiltschke C, Holzinger C, Fellingner A, Scheiner O, Gessl A, et al. Differentiation of rat bone marrow cells into macrophages under the influence of mouse L929 cell supernatant. *Journal of leukocyte biology* 1987, 41(1): 83-91.
54. Stuart LM, Deng J, Silver JM, Takahashi K, Tseng AA, Hennessy EJ, et al. Response to *Staphylococcus aureus* requires CD36-mediated phagocytosis triggered by the COOH-terminal cytoplasmic domain. *J Cell Biol* 2005, 170(3): 477-485.
